# Supplementary material for: Substantial enhancement in the photocatalytic degradation of organic/inorganic pollutants in water and photoelectrochemical activity using TiO2@Ag@LaFeO3 core–shell nanorods
Source: Royal Society of Chemistry journal article supplement (doi:10.1039/d1nj05672g), 2022-01-01
Supplement: d1nj05672g1.pdf [file d1nj05672g1.pdf]

**Supporting information:**

**for**

**Substantial enhancement in the photocatalytic degradation of organic/inorganic pollutants in water and photo-electrochemical activity using  $\text{TiO}_2@\text{Ag}@\text{LaFeO}_3$  core-shell nanorod**

Mrinmoy Misra<sup>1\*</sup>, Shambo Roy Chowdhury<sup>1</sup>, Narinder Singh<sup>2</sup>, Vanish Kumar<sup>3</sup>, Sang-Wha Lee<sup>4</sup>,  
Abhijit N. Kadam<sup>4\*</sup>

<sup>1</sup>Mechatronics Engineering Department, School of Automobile, Mechanical and Mechatronics,  
Manipal University Jaipur, India.

Dr SS Bhatnagar University Institute of Chemical Engineering & Technology Panjab University,  
Chandigarh India 160014, India

<sup>3</sup>National Agri-Food Biotechnology Institute (NABI), S.A.S. Nagar, Punjab 140306, India

<sup>4</sup>Department of Chemical and Biological Engineering, Gachon University, 1342 Seongnamdaero,  
Sujeong-gu, Seongnam-si 13120, South Korea

Email id: [mrinmoymishra@gmail.com](mailto:mrinmoymishra@gmail.com) (Mrinmoy Misra)

[abhikadamchem@gmail.com](mailto:abhikadamchem@gmail.com) (Abhijit N. Kadam)

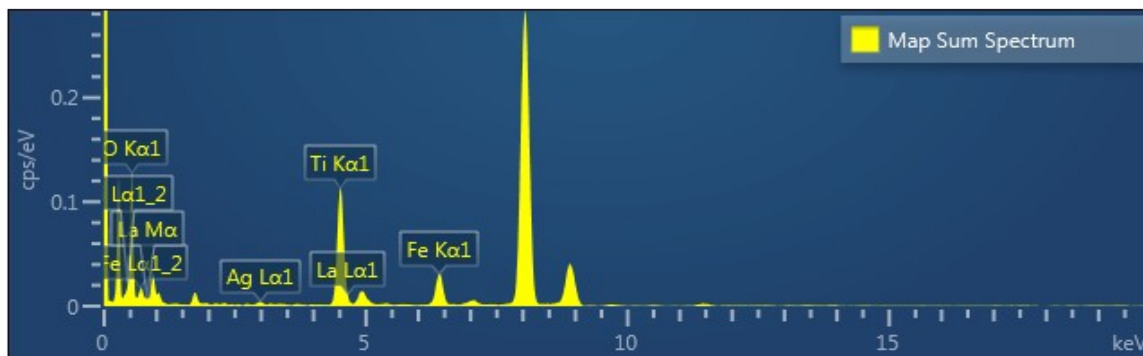

Figure S1. EDX analysis of  $\text{TiO}_2@\text{Ag}@\text{LaFeO}_3$  NRs

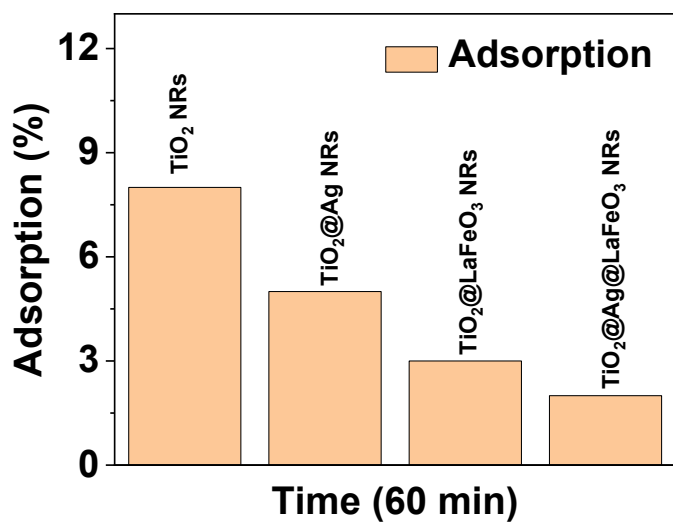

Figure S2. Adsorption of all the catalyst material

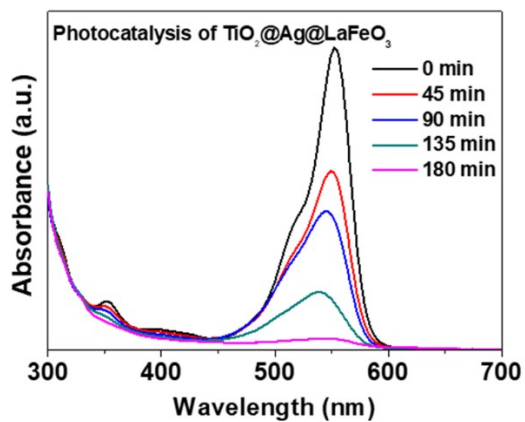

Figure S3. Time dependent photocatalytic activity of  $\text{TiO}_2@Ag@LaFeO_3$  NRs under illumination of simulated light source.

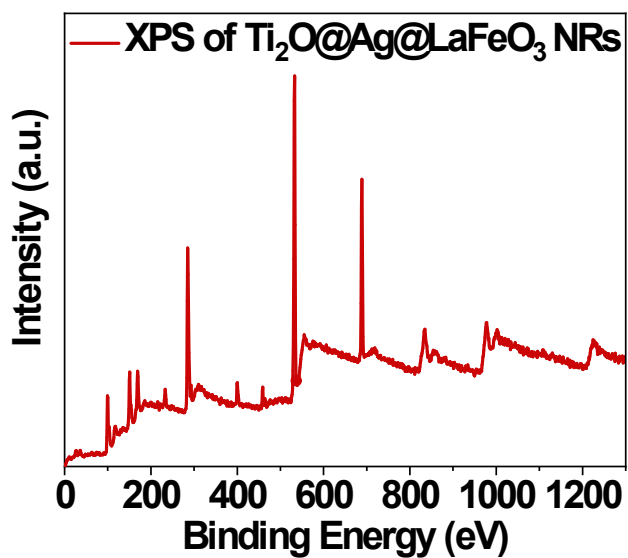

Figure S4. XPS survey spectrum of  $\text{TiO}_2@Ag@LaFeO_3$  NRs after five times recycle.

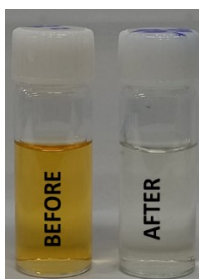

Figure S5. Image of MO dye before and after photocatalytic degradation using  $\text{TiO}_2@\text{Ag}@\text{LaFeO}_3$  NRs under illumination of simulated light source.

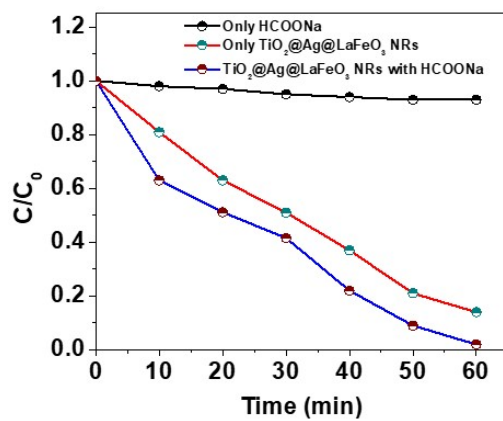

Figure S6. Photo catalytic reduction of  $\text{Cu}^{2+}$  using  $\text{TiO}_2@\text{Ag}@\text{LaFeO}_3$  NRs under different experimental conditions

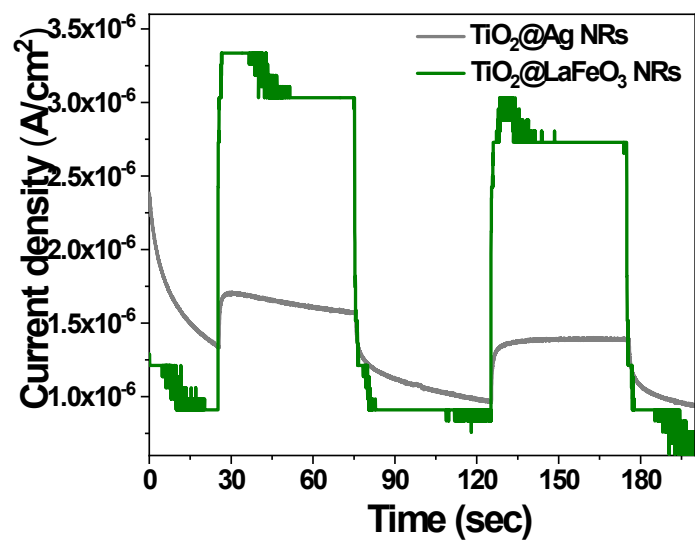

Figure S7. Photocurrent generation from  $\text{TiO}_2@Ag$  and  $\text{TiO}_2@LaFeO_3$  NRs

Table S1: Weight percentage and atomic percentage of every elements of TiO<sub>2</sub>@Ag@LaFeO<sub>3</sub>

NRs

| Element | Line Type | k Factor | k Factor type | Absorption Correction | Wt%    | Wt% Sigma | Atomic % |
|---------|-----------|----------|---------------|-----------------------|--------|-----------|----------|
| O       | K series  | 1.213    |               | 1.00                  | 39.77  | 2.12      | 69.20    |
| Ti      | K series  | 0.617    |               | 1.00                  | 39.13  | 1.92      | 22.75    |
| Fe      | K series  | 0.591    |               | 1.00                  | 12.36  | 0.94      | 6.16     |
| Ag      | L series  | 1.079    |               | 1.00                  | 2.41   | 0.94      | 0.62     |
| La      | L series  | 1.156    |               | 1.00                  | 6.33   | 2.48      | 1.27     |
| Total:  |           |          |               |                       | 100.00 |           | 100.00   |

Table S2: XPS binding energy data of TiO<sub>2</sub>@Ag@LaFeO<sub>3</sub> NRs

| Name         | Start BE | Peak BE | End BE | Height CPS | FWHM eV | At. % |
|--------------|----------|---------|--------|------------|---------|-------|
| <b>Ag3d</b>  | 377.34   | 367.88  | 365.58 | 173.65     | 0.32    | 0.53  |
| <b>C1s</b>   | 295.38   | 284.71  | 280.78 | 14591.54   | 1.6     | 57.22 |
| <b>Fe2p</b>  | 733.38   | 710.55  | 703.18 | 241.19     | 0.75    | 0.44  |
| <b>La3d3</b> | 869.48   | 852.49  | 845.18 | 562.17     | 4.47    | 0.74  |
| <b>O1s</b>   | 537.38   | 532.51  | 527.68 | 30487.38   | 1.96    | 39.97 |
| <b>Ti2p</b>  | 467.98   | 458.61  | 454.48 | 2790.32    | 1.15    | 1.1   |
